# Supplementary material
Source: Springer Nature journal article supplement (https://www.springermedizin.de/resource/supplementary/12879_2011_2104_MOESM2_ESM.pdf/9444026)

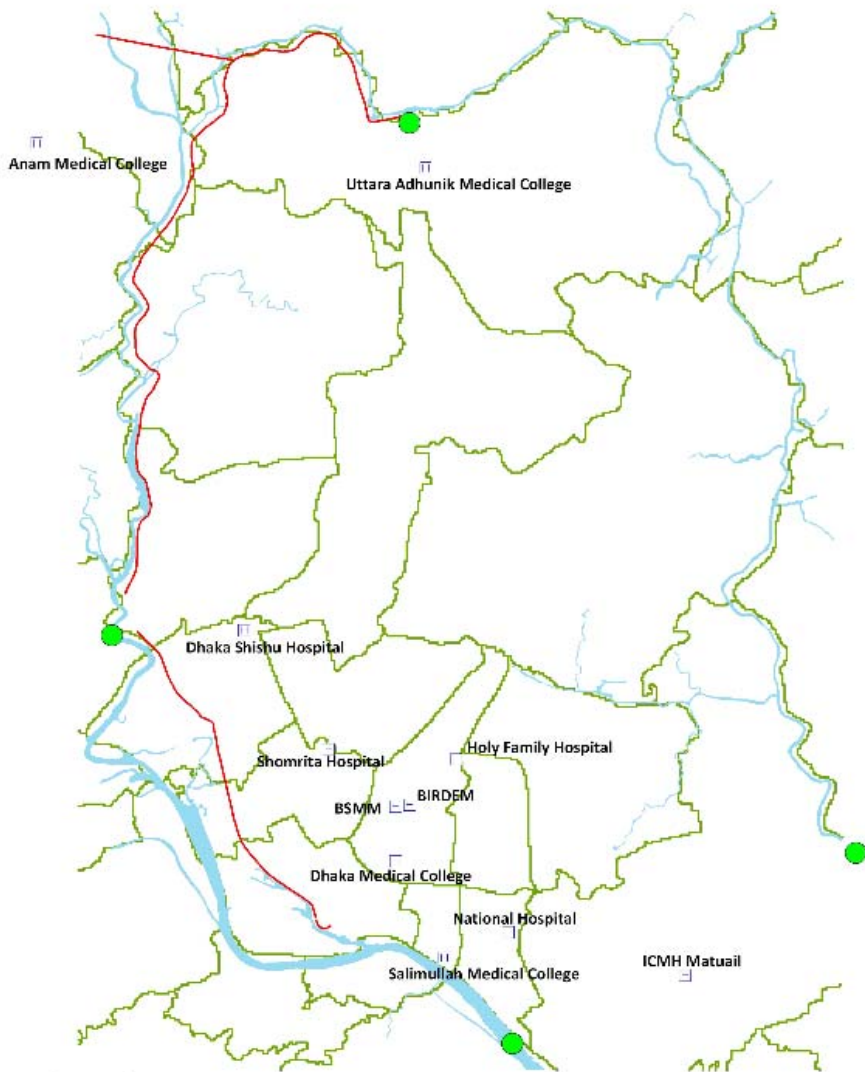

### Legend

-  Administrative Boundary (Old)
-  River Network
-  Embankment
-  Location of Hospitals
-  Water Level Stations

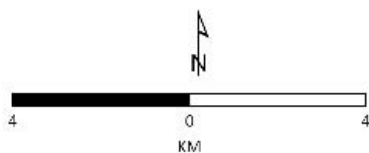

Supplement: MOESM2 [file 9444026]
